# Supplementary material for: Empathy Modulates the Activity of the Sensorimotor Mirror Neuron System during Pain Observation
Source: MDPI journal article supplement (doi:10.3390/bs13110947), 2023-11-17
Supplement: s1 [file s1]

## Supplementary Material

**Table S1.** ROIs analysis results.

| <i>Contrast: "Pain observation" vs. Control (WHOLE GROUP)</i>                                        |             |               |             |
|------------------------------------------------------------------------------------------------------|-------------|---------------|-------------|
| ROI                                                                                                  | t-statistic | Uncorrected p | Corrected p |
| Left Angular Gyrus                                                                                   | 3.94        | 0.000529      | 0.004228    |
| Left Inferior Frontal Gyrus                                                                          | 2.31        | 0.016865      | 0.127218    |
| Left Inferior Parietal Lobule                                                                        | 3.35        | 0.001882      | 0.014956    |
| Left Supramarginal Gyrus                                                                             | 3.63        | 0.001034      | 0.008241    |
| Right Angular Gyrus                                                                                  | 0.96        | 0.175592      | 0.786628    |
| Right Inferior Frontal Gyrus                                                                         | 1.05        | 0.154033      | 0.737682    |
| Right Inferior Parietal Lobule                                                                       | 1.21        | 0.121457      | 0.6451      |
| Right Supramarginal Gyrus                                                                            | 0.64        | 0.264868      | 0.914706    |
| <i>Contrast: "Pain observation" vs. Control (Men vs. Women)</i>                                      |             |               |             |
| ROI                                                                                                  | t-statistic | Uncorrected p | Corrected p |
| Left Angular Gyrus                                                                                   | 0.02        | 0.493231      | 0.995650    |
| Left Inferior Frontal Gyrus                                                                          | 0.50        | 0.310028      | 0.948637    |
| Left Inferior Parietal Lobule                                                                        | 1.05        | 0.154141      | 0.737949    |
| Left Supramarginal Gyrus                                                                             | 0.38        | 0.353028      | 0.969304    |
| Right Angular Gyrus                                                                                  | -0.01       | 0.505461      | 0.996422    |
| Right Inferior Frontal Gyrus                                                                         | 0.55        | 0.296036      | 0.939688    |
| Right Inferior Parietal Lobule                                                                       | 0.37        | 0.356951      | 0.970762    |
| Right Supramarginal Gyrus                                                                            | -0.14       | 0.553548      | 0.998422    |
| <i>Contrast: "Pain observation" vs. Control (Regression with "Perspective Taking" subscale)</i>      |             |               |             |
| ROI                                                                                                  | t-statistic | Uncorrected p | Corrected p |
| Left Angular Gyrus                                                                                   | -1.59       | 0.927096      | 1.000000    |
| Left Inferior Frontal Gyrus                                                                          | -1.39       | 0.900560      | 1.000000    |
| Left Inferior Parietal Lobule                                                                        | -0.56       | 0.704234      | 0.999941    |
| Left Supramarginal Gyrus                                                                             | -0.95       | 0.815720      | 0.999999    |
| Right Angular Gyrus                                                                                  | -1.61       | 0.928701      | 1.000000    |
| Right Inferior Frontal Gyrus                                                                         | -1.05       | 0.838879      | 1.000000    |
| Right Inferior Parietal Lobule                                                                       | -0.65       | 0.735021      | 0.999976    |
| Right Supramarginal Gyrus                                                                            | -1.71       | 0.939449      | 1.000000    |
| <i>Contrast: "Pain observation" vs. Control (Regression with "Fantasy" subscale)</i>                 |             |               |             |
| ROI                                                                                                  | t-statistic | Uncorrected p | Corrected p |
| Left Angular Gyrus                                                                                   | -0.04       | 0.516548      | 0.997016    |
| Left Inferior Frontal Gyrus                                                                          | -0.06       | 0.521532      | 0.997253    |
| Left Inferior Parietal Lobule                                                                        | 0.91        | 0.193446      | 0.820911    |
| Left Supramarginal Gyrus                                                                             | 0.10        | 0.460919      | 0.992868    |
| Right Angular Gyrus                                                                                  | 0.04        | 0.482572      | 0.994862    |
| Right Inferior Frontal Gyrus                                                                         | 1.03        | 0.165178      | 0.764088    |
| Right Inferior Parietal Lobule                                                                       | 1.24        | 0.123264      | 0.650901    |
| Right Supramarginal Gyrus                                                                            | 0.84        | 0.210284      | 0.848725    |
| <i>Contrast: "Pain facial expressions" vs. Control (Regression with "Empathic Concern" subscale)</i> |             |               |             |
| ROI                                                                                                  | t-statistic | Uncorrected p | Corrected p |
| Left Angular Gyrus                                                                                   | 3.35        | 0.004279      | 0.033722    |
| Left Inferior Frontal Gyrus                                                                          | 3.28        | 0.004754      | 0.037402    |
| Left Inferior Parietal Lobule                                                                        | 1.78        | 0.053984      | 0.358514    |
| Left Supramarginal Gyrus                                                                             | 2.59        | 0.014502      | 0.110294    |

|                                                                                                       |                    |                      |                    |
|-------------------------------------------------------------------------------------------------------|--------------------|----------------------|--------------------|
| Right Angular Gyrus                                                                                   | 2.89               | 0.008972             | 0.069561           |
| Right Inferior Frontal Gyrus                                                                          | 2.32               | 0.022914             | 0.169268           |
| Right Inferior Parietal Lobule                                                                        | 1.92               | 0.043716             | 0.300647           |
| Right Supramarginal Gyrus                                                                             | 3.40               | 0.003923             | 0.030955           |
| <i>Contrast: "Pain facial expressions" vs. Control (Regression with "Personal Distress" subscale)</i> |                    |                      |                    |
| <b>ROI</b>                                                                                            | <b>t-statistic</b> | <b>Uncorrected p</b> | <b>Corrected p</b> |
| Left Angular Gyrus                                                                                    | -1.16              | 0.861205             | 1.000000           |
| Left Inferior Frontal Gyrus                                                                           | 0.31               | 0.383497             | 0.979132           |
| Left Inferior Parietal Lobule                                                                         | -1.33              | 0.892365             | 1.000000           |
| Left Supramarginal Gyrus                                                                              | -1.23              | 0.875668             | 1.000000           |
| Right Angular Gyrus                                                                                   | -1.08              | 0.845040             | 1.000000           |
| Right Inferior Frontal Gyrus                                                                          | -0.53              | 0.694544             | 0.999924           |
| Right Inferior Parietal Lobule                                                                        | -1.01              | 0.831579             | 0.999999           |
| Right Supramarginal Gyrus                                                                             | -0.94              | 0.813250             | 0.999999           |

**Table S2.** Regression analysis between activity in the mirror neuron system activity region of interest (ROI) and the Interpersonal Reactivity Index (IRI) subscales.

| <b>ROI</b> | <b>IRI's Subscale</b> | <b>Beta</b> | <b>p-value</b> |
|------------|-----------------------|-------------|----------------|
| Left IFG   | PT                    | -0.445      | 0.096          |
|            | FS                    | -0.205      | 0.400          |
|            | EC                    | 0.745       | 0.012          |
|            | PD                    | -0.083      | 0.700          |
| Left IPL   | PT                    | -0.208      | 0.379          |
|            | FS                    | -0.099      | 0.655          |
|            | EC                    | 0.794       | 0.005          |
|            | PD                    | -0.159      | 0.423          |
| Left AG    | PT                    | -0.289      | 0.270          |
|            | FS                    | 0.117       | 0.630          |
|            | EC                    | 0.536       | 0.059          |
|            | PD                    | -0.363      | 0.107          |
| Left SMG   | PT                    | -0.216      | 0.439          |
|            | FS                    | 0.066       | 0.800          |
|            | EC                    | 0.507       | 0.092          |
|            | PD                    | -0.230      | 0.329          |
| Right IFG  | PT                    | -0.342      | 0.223          |
|            | FS                    | -0.098      | 0.705          |
|            | EC                    | 0.616       | 0.044          |
|            | PD                    | -0.182      | 0.435          |
| Right IPL  | PT                    | -0.017      | 0.951          |
|            | FS                    | 0.352       | 0.196          |
|            | EC                    | 0.136       | 0.640          |
|            | PD                    | -0.223      | 0.350          |
| Right AG   | PT                    | -0.468      | 0.089          |
|            | FS                    | 0.119       | 0.632          |
|            | EC                    | 0.504       | 0.078          |
|            | PD                    | -0.360      | 0.117          |
| Right SMG  | PT                    | -0.464      | 0.079          |
|            | FS                    | 0.258       | 0.285          |
|            | EC                    | 0.496       | 0.072          |
|            | PD                    | -0.336      | 0.126          |

**PT:** "Perspective Taking"; **FS:** "Fantasy"; **EC:** "Empathic Concern"; and **PD:** "Personal Distress."
